# Supplementary figures and images for: Evolution of empathetic moral evaluation
Source: eLife journal article supplement (doi:10.7554/elife.44269), 2019-04-08

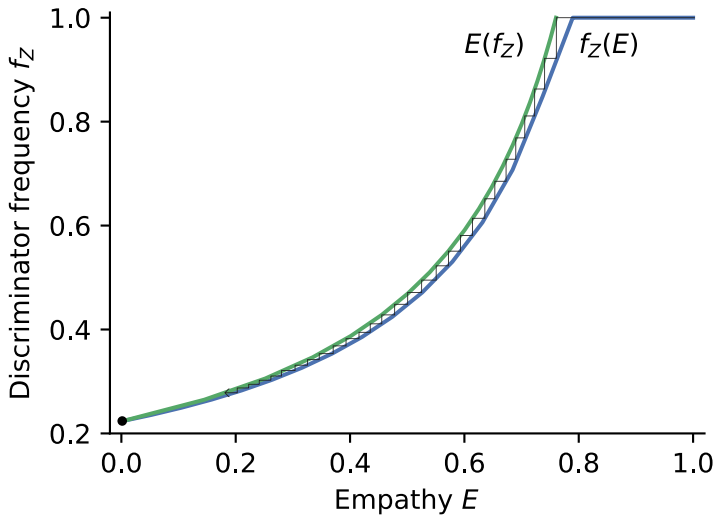

Supplement: supp [file elife-44269-supp-v1.zip]

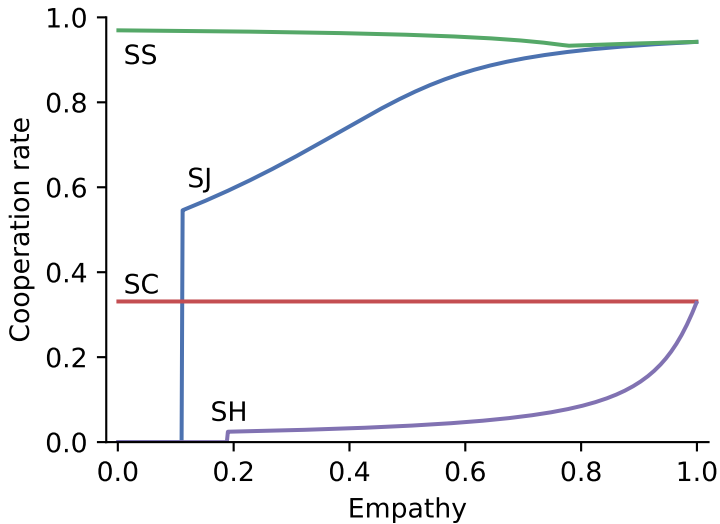

Supplement: supp [file elife-44269-supp-v1.zip]

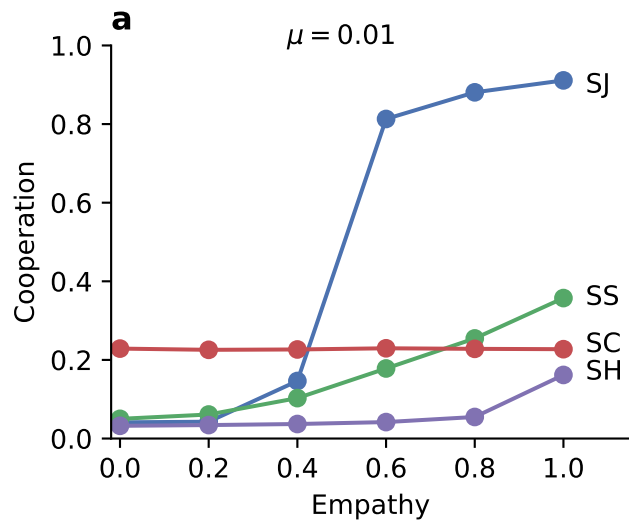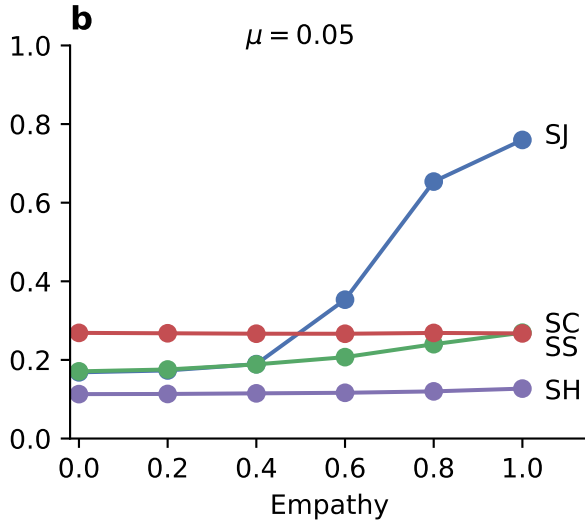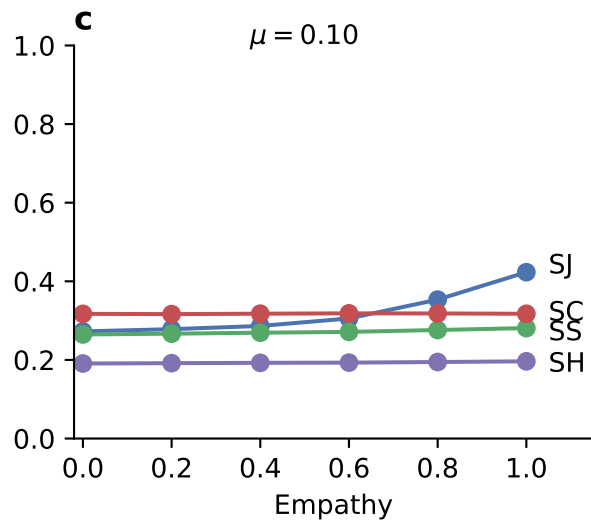

Supplement: supp [file elife-44269-supp-v1.zip]
